# Supplementary material for: The FLI portion of EWS/FLI contributes a transcriptional regulatory function that is distinct and separable from its DNA-binding function in Ewing sarcoma
Source: PubMed Central journal article supplement (PMC8298202; doi:10.1038/s41388-021-01876-5), 2021-06-18

**A**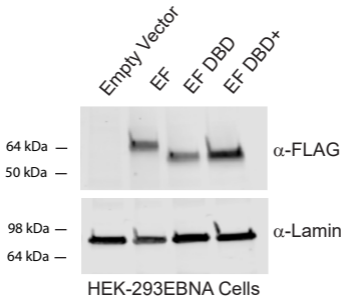

**A**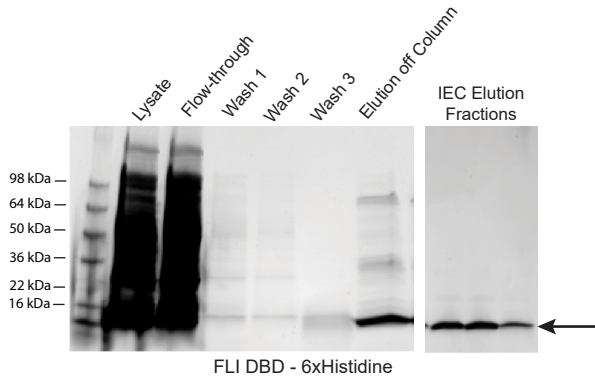**B**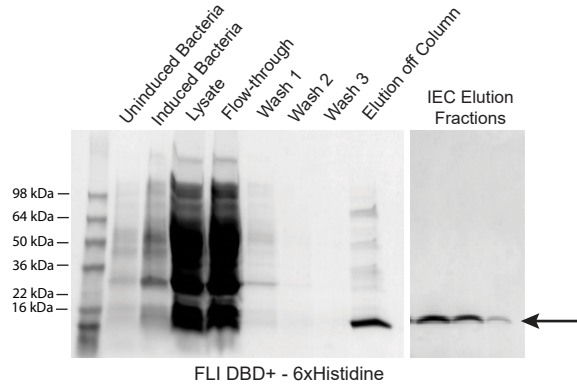

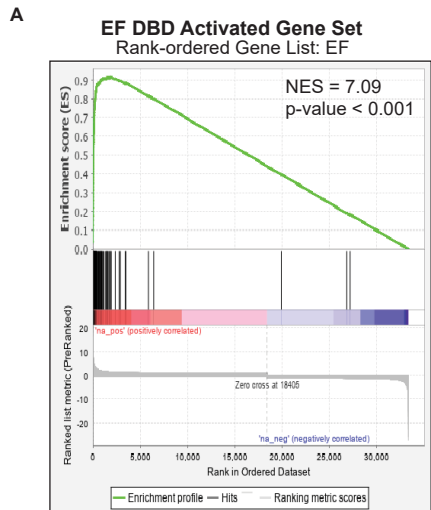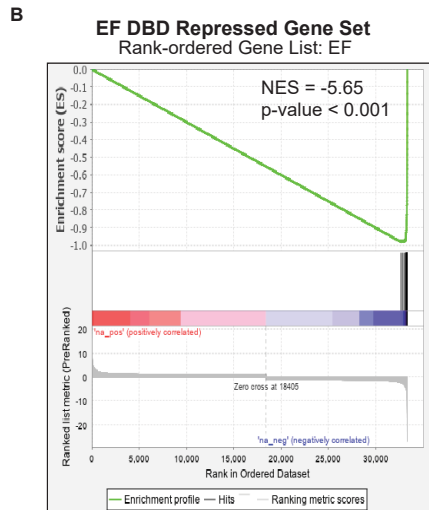

**C** Genes Repressed by EWS/FLI (n=533)

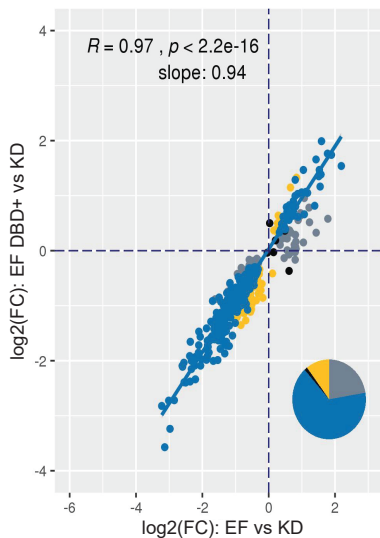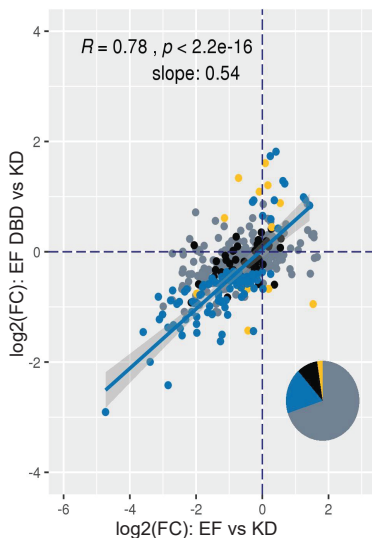

Key: ■ Rescued ■ Not Rescued ■ Non-specific ■ No change with KD

**A**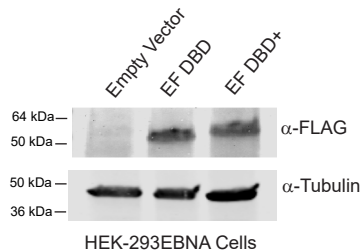**B**

Genes Activated by EWS/FLI Constructs

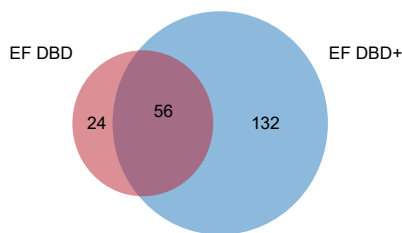**C**

Genes Repressed by EWS/FLI Constructs

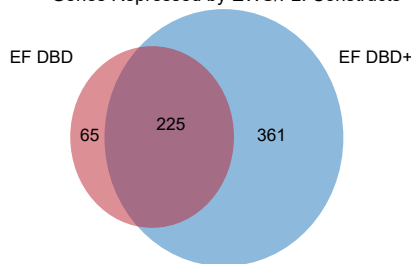**D**EF DBD Activated Gene Set  
Rank-ordered Gene List: EF DBD+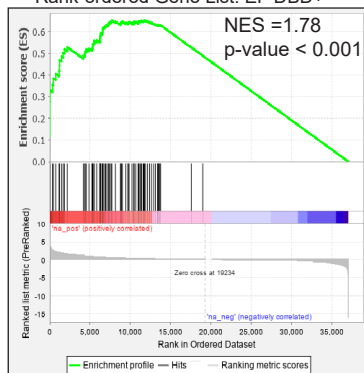**E**EF DBD Repressed Gene Set  
Rank-ordered Gene List: EF DBD+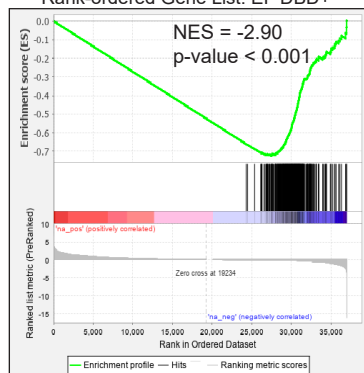

A

## EWS/FLI-mediated Activated Genes

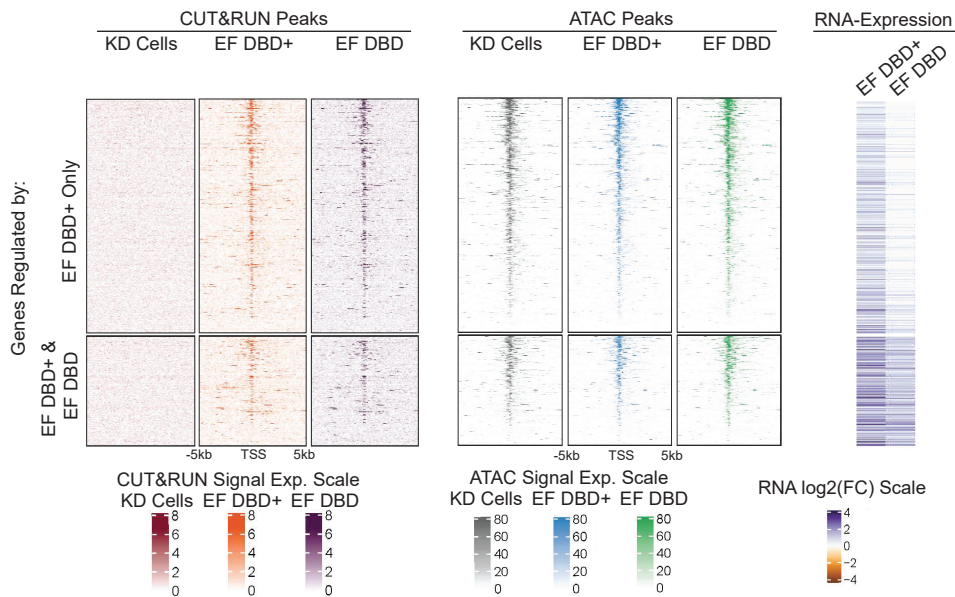

B

## EWS/FLI-mediated Repressed Genes

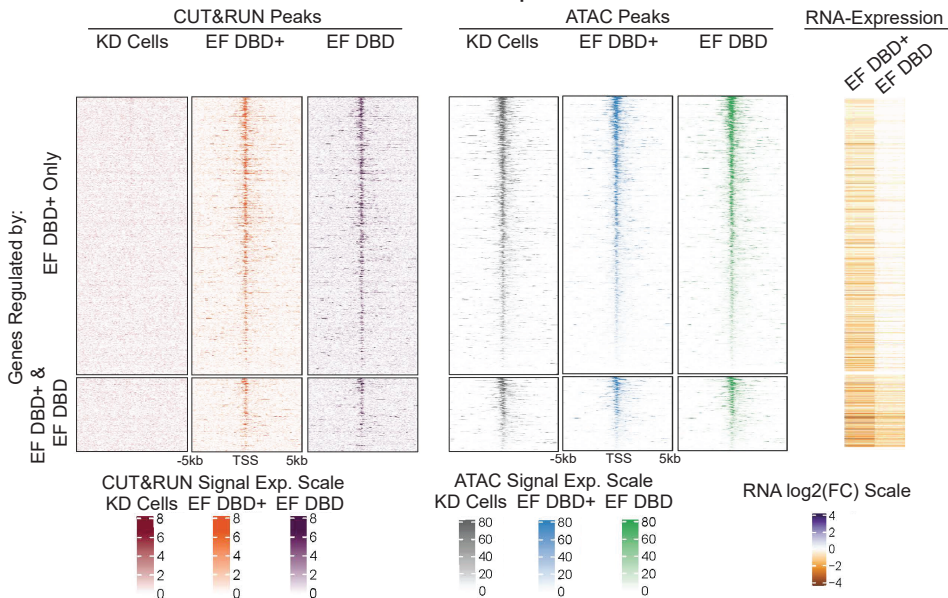

**A**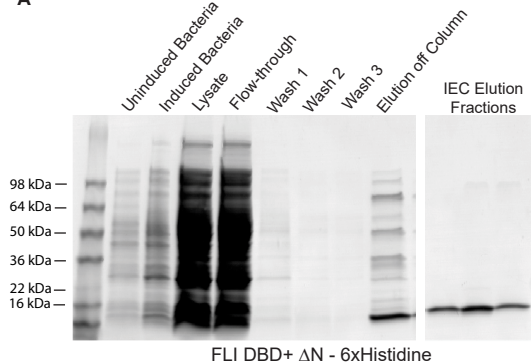**B**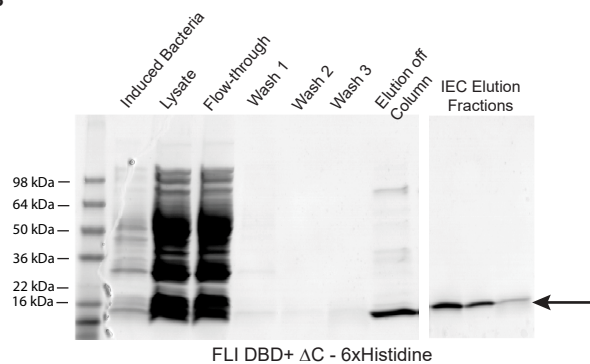**C**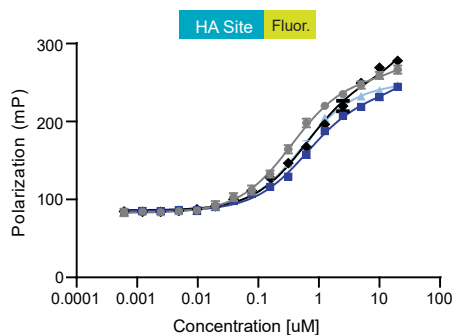**D**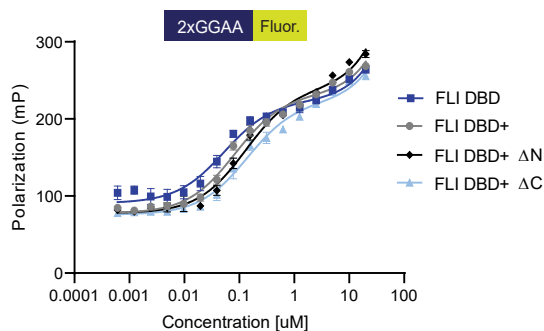**E**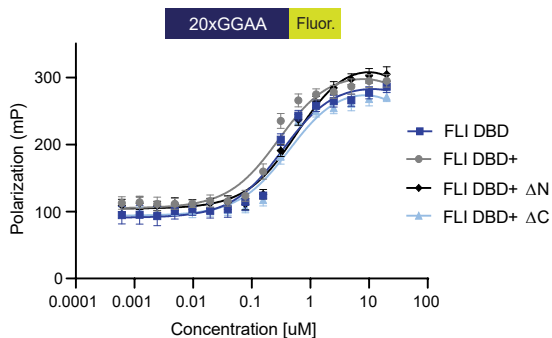**F**

| Construct           | $K_D$                     |
|---------------------|---------------------------|
| <i>HA Site</i>      |                           |
| FLI DBD             | $K_D = 625.3 \pm 17.5$ nM |
| FLI DBD+            | $K_D = 354.2 \pm 8.0$ nM  |
| FLI DBD+ $\Delta$ N | $K_D = 616.4 \pm 19.5$ nM |
| FLI DBD+ $\Delta$ C | $K_D = 517.5 \pm 11.9$ nM |
| <i>2xGGAA</i>       |                           |
| FLI DBD             | $K_D = 52.9 \pm 2.7$ nM   |
| FLI DBD+            | $K_D = 82.7 \pm 2.8$ nM   |
| FLI DBD+ $\Delta$ N | $K_D = 128.2 \pm 4.7$ nM  |
| FLI DBD+ $\Delta$ C | $K_D = 137.6 \pm 5.3$ nM  |
| <i>20xGGAA</i>      |                           |
| FLI DBD             | $K_D = 337.7 \pm 20.9$ nM |
| FLI DBD+            | $K_D = 293.1 \pm 16.4$ nM |
| FLI DBD+ $\Delta$ N | $K_D = 598.6 \pm 31.0$ nM |
| FLI DBD+ $\Delta$ C | $K_D = 442.5 \pm 26.4$ nM |

**A**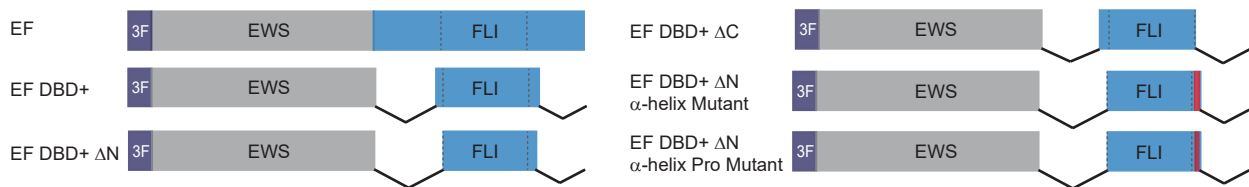**B**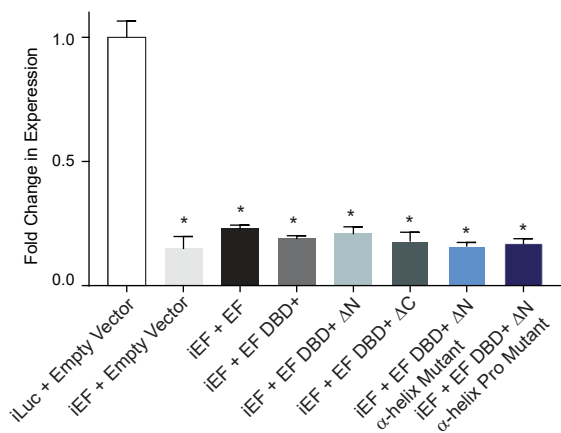**C**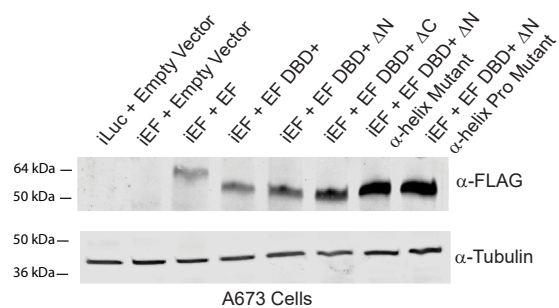**D**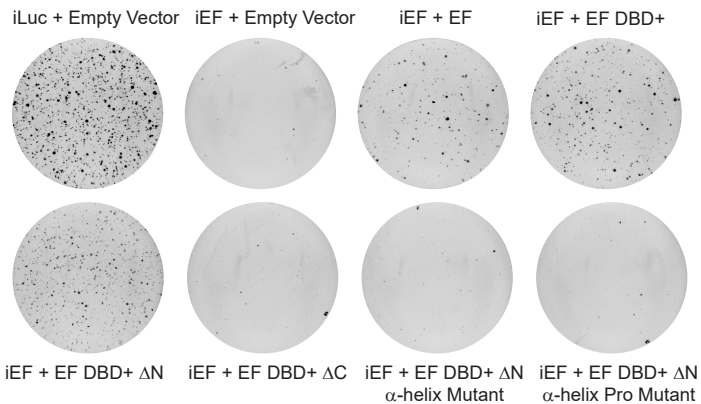**E**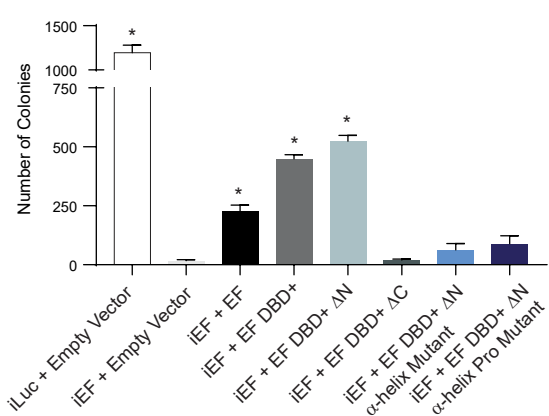

**A**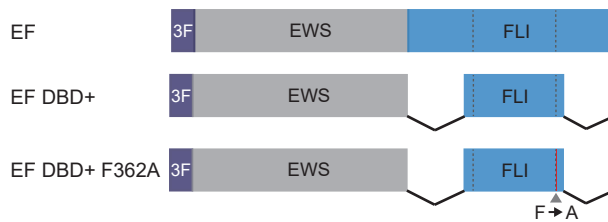**B**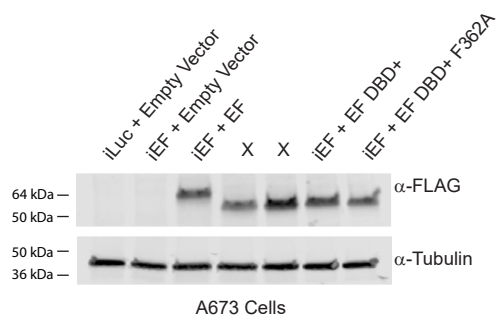**C**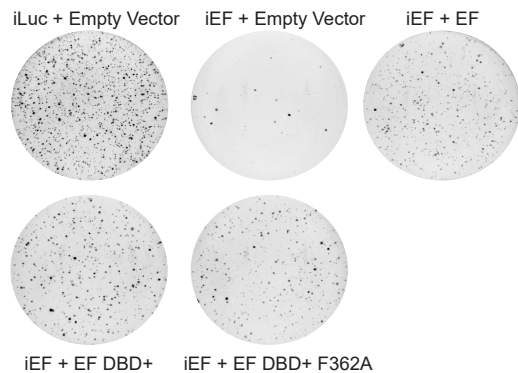**D**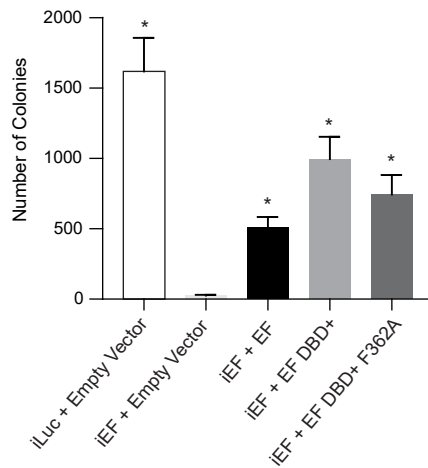

Supplement: 41388_2021_1876_MOESM1_ESM.pdf [file 41388_2021_1876_MOESM1_ESM.pdf]
